# Supplementary material for: Multiple Mechanisms of Photoreceptor Spectral Tuning in Heliconius Butterflies
Source: PubMed Central journal article supplement (PMC9048915; doi:10.1093/molbev/msac067), 2022-03-28
Supplement: msac067_supplementary_data.pdf [file msac067_supplementary_data.pdf]

## Supplementary Data

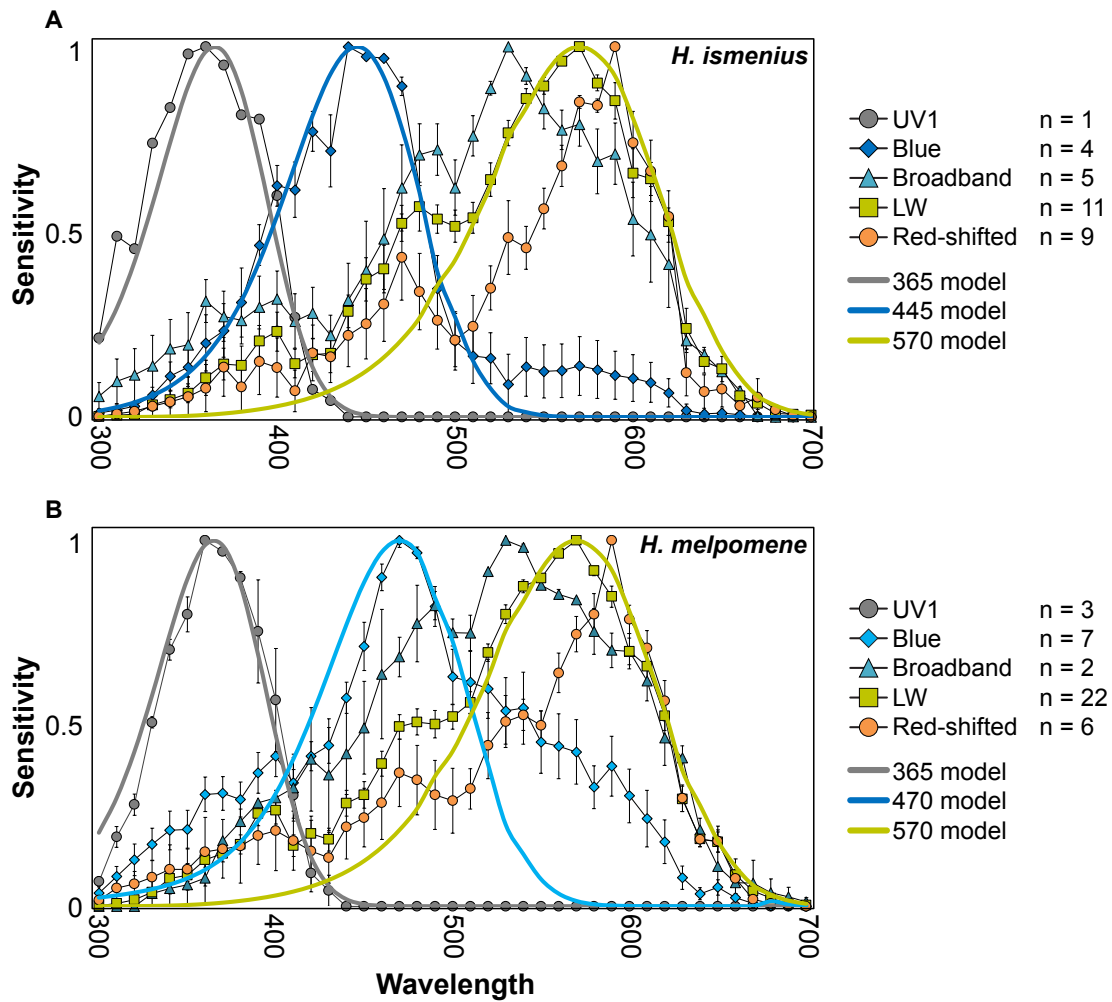

**Figure S1. Averaged spectral sensitivities in *H. ismenius* and *H. melpomene*.** All recordings used for **A)** *H. ismenius* and **B)** *H. melpomene* were averaged and presented here with standard error bars. Rhodopsin absorbance spectra are also shown for cells that appear to express a single kind of opsin. For each photoreceptor cell type, the number (n) of individual cells recorded from are listed.

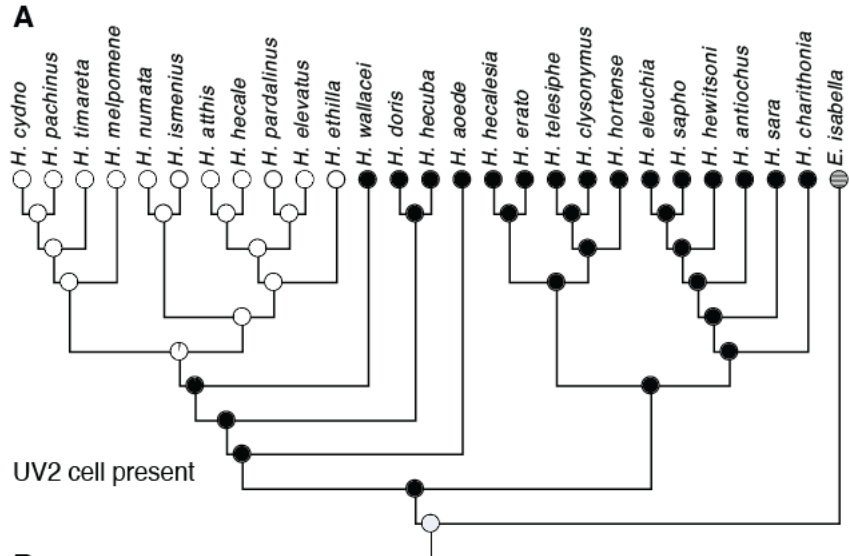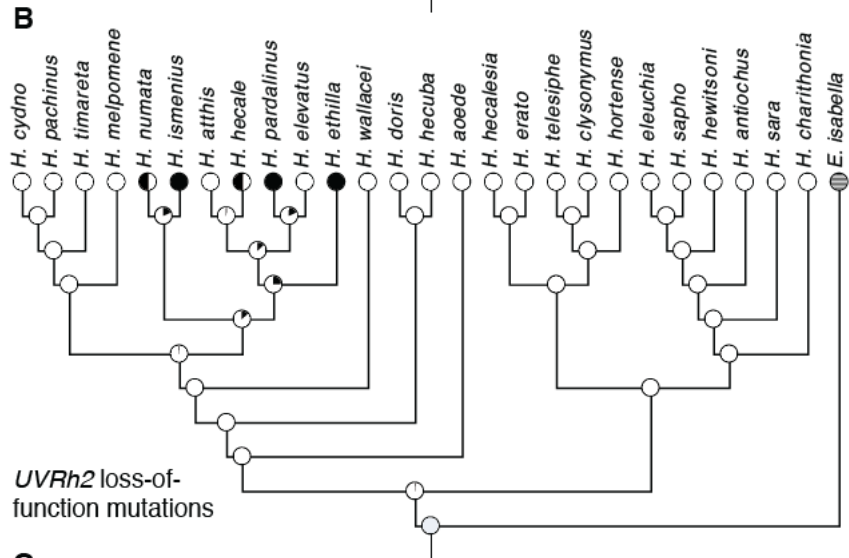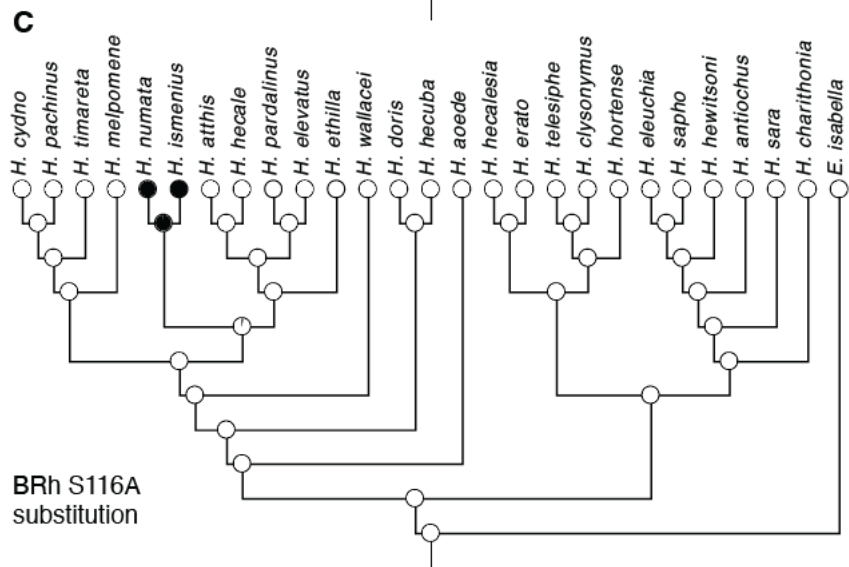

**Figure S2. Ancestral state reconstruction of UVRh and BRh character mapping.** Maximal likelihood analysis was run in Mesquite using species we have previously sequenced and/or immunolabeled. **A)** Previously known expression of UVRh2 protein (black) is mapped and shows a loss of expression (white) at the base of the clade including *H. melpomene* and *H. ismenius*. *E. isabella* is shaded out because this species diverged before the *UVRh* duplication event. **B)** The presence of any loss-of-function mutations known in the *UVRh2* gene locus were mapped onto the phylogeny (black). *H. numata* and *H. hecale* were found to have both intact and non-functional copies of *UVRh2*, depending on the individual sequenced (black and white, coded as intact gene present for likelihood analysis). Ancestral state reconstruction suggests loss-of-function is occurring multiple times in parallel within this clade. **C)** The presence of the S116A substitution is mapped (black), which has been shown, by site-directed mutagenesis of the blue-absorbing rhodopsins in other butterflies, to be a spectral tuning site. Of all *Heliconius* species sequenced, this has evolved only once, recently, *within* the silvaniform clade, well after loss of the UVRh2 cell.

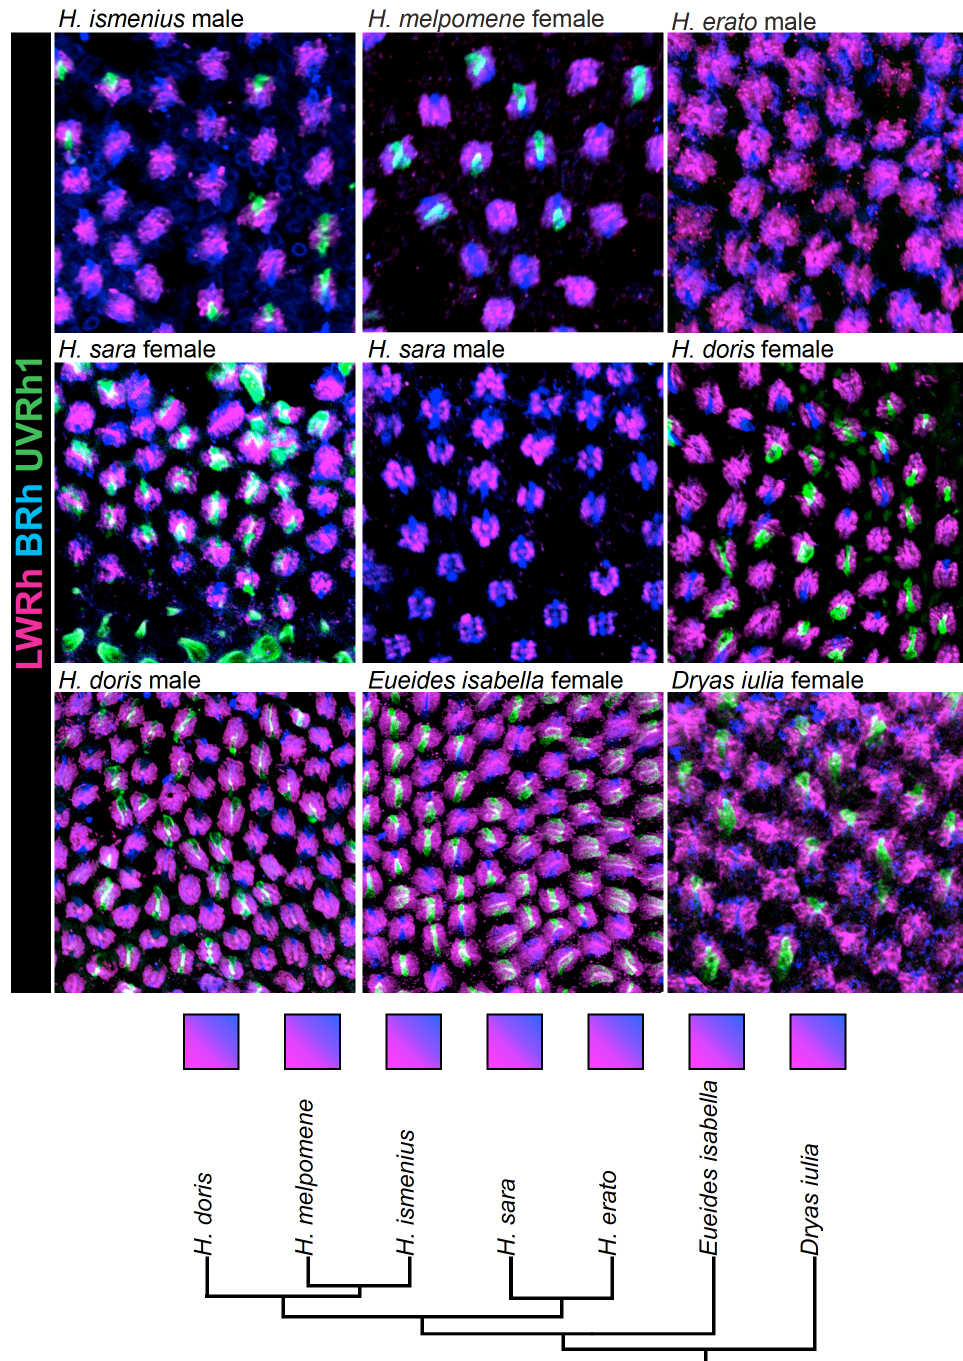

**Figure S3. Antibody stains for LWRh and BRh show opsin coexpression in *Heliconius* species and outgroups.** Triple labelling of photoreceptor cells in the adult compound eyes of *H. ismenius*, *H. melpomene*, *H. erato*, *H. sara*, *H. doris*, *Eueides isabella* and *Dryas iulia* using anti-LWRh (pink), anti-BRh (blue) and anti-UVRh1 (green) antibodies reveals coexpression of LWRh and BRh in every major clade within *Heliconius* as well as in the outgroup genera *Eueides* and *Dryas*.

**Table S1. ATAC-seq samples and statistics.**

| Sample  | Specimen | Sex | Tissue         | Reads    | Paired   | % paired | Reads Aligned | % mapped | % properly paired | Total Peaks |
|---------|----------|-----|----------------|----------|----------|----------|---------------|----------|-------------------|-------------|
| HMP516b | HMP516   | F   | brain          | 31518059 | 30372185 | 96.36    | 36740592      | 100      | 91.68             | 13275       |
| HMP516e | HMP516   | F   | photoreceptors | 36448289 | 35180835 | 95.52    | 42110559      | 100      | 87.79             | 9009        |
| HMP517b | HMP517   | M   | brain          | 36025856 | 34750866 | 96.46    | 41873107      | 100      | 91.76             | 22890       |
| HMP517e | HMP517   | M   | photoreceptors | 55863519 | 53884930 | 96.46    | 65897894      | 100      | 90.39             | 6304        |
| HMP540b | HMP540   | F   | brain          | 41305222 | 39817558 | 96.4     | 45787536      | 100      | 91.53             | 4101        |
| HMP540e | HMP540   | F   | photoreceptors | 30515084 | 29270537 | 95.92    | 36601722      | 100      | 92.57             | 4781        |
| HMP541b | HMP541   | M   | brain          | 16349872 | 15661333 | 95.79    | 20077349      | 100      | 91.39             | 4457        |
| HMP541e | HMP541   | M   | photoreceptors | 30691619 | 29773599 | 97.01    | 37971102      | 100      | 93.02             | 5455        |

**Table S2. TOBIAS footprinting scores for eye and brain *UVRh1* and *UVRh2* loci.**

(separate table)

**Table S3. Species, sex, and number of recorded cells used in this study.**

| Species             | Sex    | Cell Peak |     |     |     |     |     |
|---------------------|--------|-----------|-----|-----|-----|-----|-----|
|                     |        | 365       | 445 | 470 | 530 | 570 | 590 |
| <i>H. ismenius</i>  | female | 1         | 1   | -   | 3   | 6   | 5   |
| <i>H. ismenius</i>  | male   | 0         | 3   | -   | 2   | 5   | 4   |
| <i>H. melpomene</i> | female | 0         | -   | 1   | 1   | 8   | 4   |
| <i>H. melpomene</i> | male   | 3         | -   | 6   | 2   | 14  | 2   |

**Table S4. Least squares regression fits summary.**

| <i>H. ismenius</i>  |                              |            |         |          |          |           |      |
|---------------------|------------------------------|------------|---------|----------|----------|-----------|------|
|                     | Estimate ( $\lambda_{max}$ ) | Std. Error | t value | Pr(> t ) | Residual | St. Error | d.f. |
| <b>UV1</b>          | <b>365.42</b>                | 1.252      | 291.9   | <2e-16   | 0.06095  |           | 15   |
| <b>B</b>            | <b>447.78</b>                | 2.298      | 194.9   | <2e-16   | 0.08371  |           | 26   |
| <b>LW</b>           | <b>564.73</b>                | 1.083      | 521.4   | <2e-16   | 0.04174  |           | 14   |
| <i>H. melpomene</i> |                              |            |         |          |          |           |      |
|                     | Estimate ( $\lambda_{max}$ ) | Std. Error | t value | Pr(> t ) | Residual | St. Error | d.f. |
| <b>UV1</b>          | <b>367.29</b>                | 0.4457     | 824.1   | <2e-16   | 0.02072  |           | 35   |
| <b>B</b>            | <b>471.36</b>                | 2.839      | 166     | 3.22E-12 | 0.0892   |           | 6    |
| <b>LW</b>           | <b>565.64</b>                | 0.9007     | 628     | <2e-16   | 0.03174  |           | 14   |
